# Supplementary material for: Probing multiple enzymatic methylation events in real time with NMR spectroscopy
Source: PubMed Central journal article supplement — Biophys J. 2021 Sep 28;120(21):4710–21. doi: 10.1016/j.bpj.2021.09.034 (PMC8595733; doi:10.1016/j.bpj.2021.09.034), 2021-09-28
Supplement: mmc1.pdf [file mmc1.pdf]

**Biophysical Journal, Volume 120**

**Supplemental information**

**Probing multiple enzymatic methylation events in real time with NMR  
spectroscopy**

**Emery T. Usher, Kevin E.W. Namitz, Michael S. Cosgrove, and Scott A. Showalter**

## Supporting Information

### **Probing multiple enzymatic methylation events in real time with NMR spectroscopy**

Emery T. Usher<sup>1</sup>, Kevin E. W. Namitz<sup>2</sup>, Michael S. Cosgrove<sup>3</sup>, and Scott A. Showalter<sup>1,2\*</sup>

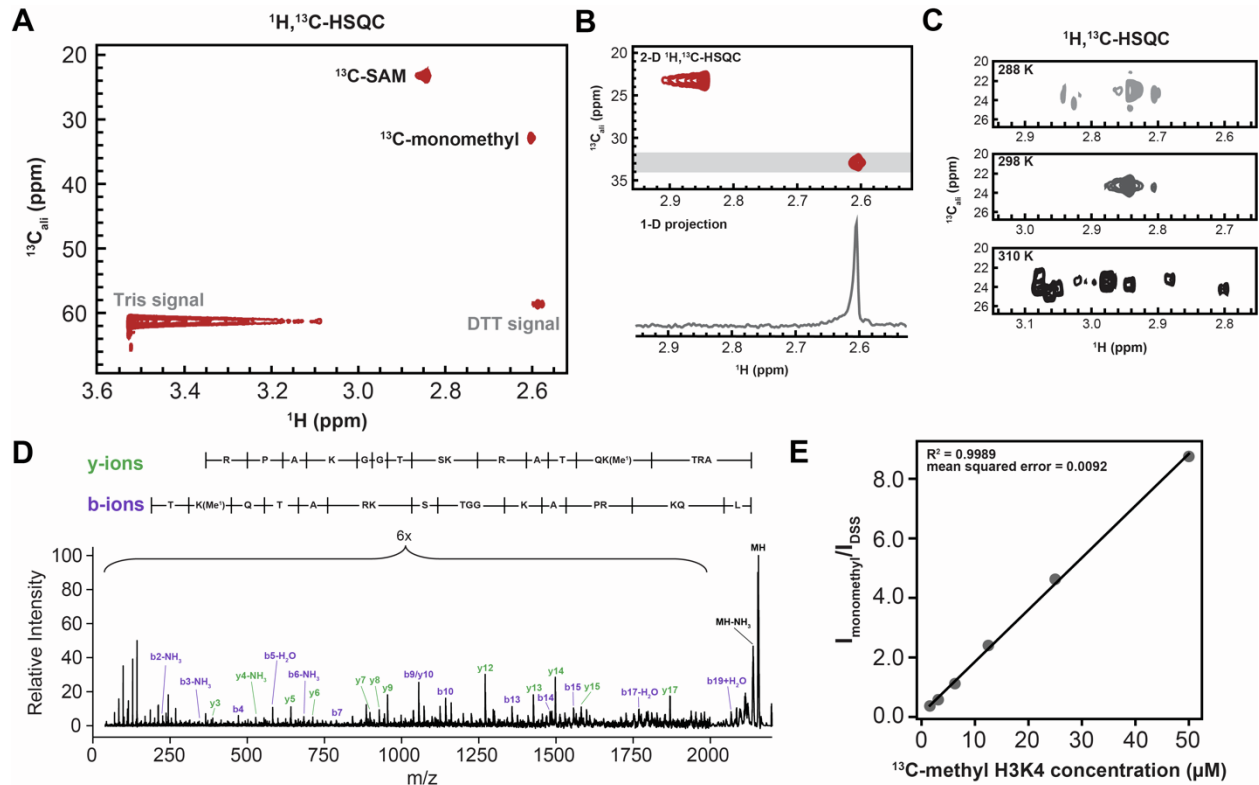

**Supporting Figure 1: Detection of monomethylated H3 peptide by NMR and mass spectrometry.** (A) 2-D  $^1\text{H}, ^{13}\text{C}$ -HSQC of an endpoint reaction of natural-abundance H3<sub>1-20</sub> and Set7 with  $^{13}\text{C}$ -SAM as the cofactor. The region of the spectrum that contains the peaks of interest ( $^{13}\text{C}$ -SAM and  $^{13}\text{C}$ -methyllysine) is distinct from the region that contains signals from the buffer components. (B) Zoomed-in and cropped view of the HSQC in (A) (top). The grey shaded region represents the slice of the 2-D experiment used to calculate the 1-D projection (bottom) for the purposes of tracking the monomethyl peak over >100 experiments. (C) The  $^{13}\text{C}$ -SAM resonance(s) at the final timepoint of a real-time NMR experiment at three temperatures. The presence of multiple distinct peaks at the end of a methylation reaction conducted at 310 K, but not the lower temperatures, suggests a temperature-dependent instability of the  $^{13}\text{C}$ -SAM cofactor. (D) MALDI-TOF-TOF MS/MS spectrum of the +Me1 peak from (D) confirms that H3<sub>1-20</sub> was monomethylated on Lys4. (E) Plot of ratio of monomethylated H3 and DSS standard intensities versus H3 concentration. Linear regression demonstrates linearity of monomethyl peak intensity with respect to monomethyl peptide concentration between 1 and 50  $\mu\text{M}$ .

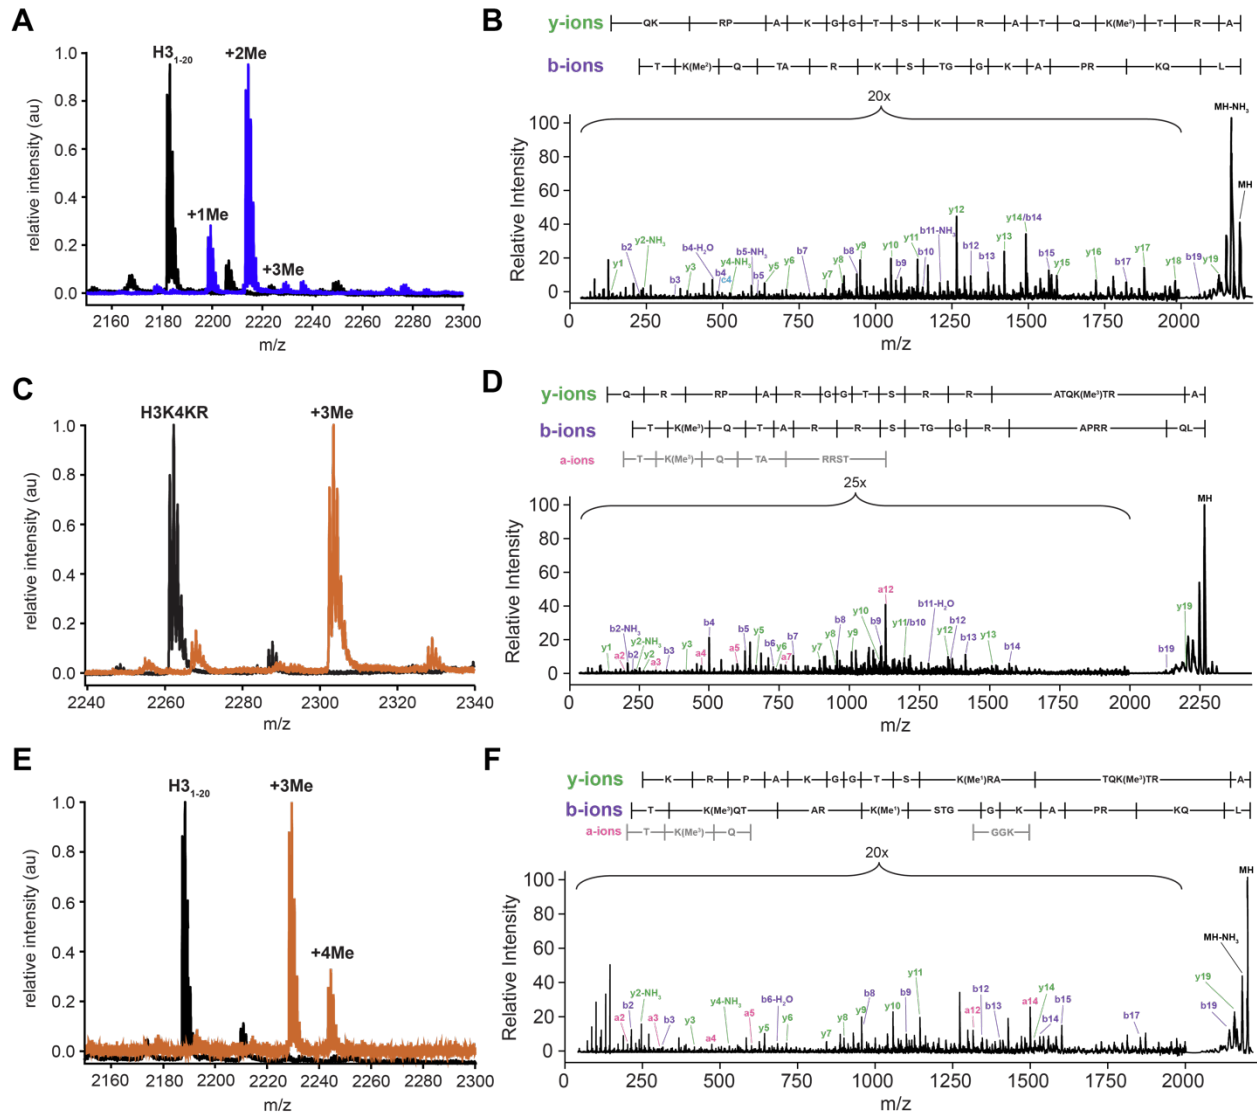

**Supporting Figure 2: Extent of methylation and location of modifications for MLL1 and PRDM9 validated by MALDI-TOF MS and TOF-TOF MS/MS.** (A) The MALDI-TOF mass spectrum of unmodified H3<sub>1-20</sub> (black, 2183 m/z) compared with H3<sub>1-20</sub> following treatment with MLL1 and <sup>13</sup>C-SAM (blue) shows primarily dimethylation (+Me<sub>2</sub>, 2213 m/z). Congruent with the final NMR timepoint, there was still some remaining monomethylated peptide (+Me<sub>1</sub>, 2198 m/z). We also observed a very small population of trimethylated peptide, which is consistent with previous reports on MLL1 activity. (B) MS/MS spectrum of the +Me<sub>2</sub> peak from (A) shows that both methyl marks were placed on Lys 4. (C) Mass spectrum of unmodified H3K4KR peptide (black, 2267 m/z) compared with H3K4KR after treatment with PRDM9 and <sup>13</sup>C-SAM (orange) shows complete trimethylation (+Me<sub>3</sub>, 2312 m/z). (D) MS/MS spectrum of the +3Me peak from (C) shows that all three methyl marks were directed to Lys 4. (E) Mass spectrum of unmodified H3<sub>1-20</sub> (black, 2183 m/z) compared with H3<sub>1-20</sub> after treatment with PRDM9 and <sup>13</sup>C-SAM (orange) shows that trimethylation (+Me<sub>3</sub>, 2228 m/z) was the major species. A peak at 2243 m/z suggests that a minor population of H3<sub>1-20</sub> was tetramethylated (+Me<sub>4</sub>, 2243 m/z). (F) MS/MS analysis of the +4Me peak from (E) shows that PRDM9 placed an aberrant methyl mark on Lys 9 in addition to the expected three on Lys 4. This justified our switch to a lysine-deficient mutant peptide (H3K4KR) for PRDM9 analysis by RT-NMR.

**Supporting Table 1: Chemical shifts of peaks of interest for each methyltransferase.**

|            | Set7 <sup>†</sup>             |                                | MLL1                          |                                | PRDM9                         |                                |
|------------|-------------------------------|--------------------------------|-------------------------------|--------------------------------|-------------------------------|--------------------------------|
|            | $\delta$ <sup>1</sup> H (ppm) | $\delta$ <sup>13</sup> C (ppm) | $\delta$ <sup>1</sup> H (ppm) | $\delta$ <sup>13</sup> C (ppm) | $\delta$ <sup>1</sup> H (ppm) | $\delta$ <sup>13</sup> C (ppm) |
| SAM        | 2.842                         | 23.229                         | 2.779                         | 23.110                         | 2.777                         | 23.130                         |
| monomethyl | 2.603                         | 32.860                         | 2.536                         | 32.751                         | 2.533                         | 32.811                         |
| dimethyl   | --                            | --                             | 2.684                         | 42.655                         | 2.680                         | 42.646                         |
| trimethyl  | --                            | --                             | --                            | --                             | 2.940                         | 52.717                         |

<sup>†</sup>Set7 experiments were conducted at 298 K whereas MLL1 and PRDM9 experiments were collected at 288 K.

**Supporting Table 2: Key reagents and resources used in this study.**

| REAGENT or RESOURCE                                  | SOURCE                                                                                                                                                                                      | IDENTIFIER          |
|------------------------------------------------------|---------------------------------------------------------------------------------------------------------------------------------------------------------------------------------------------|---------------------|
| <b>Bacterial and Virus Strains</b>                   |                                                                                                                                                                                             |                     |
| BL21(DE3) <i>E. coli</i>                             | New England BioLabs                                                                                                                                                                         | Cat# C25271         |
| Rosetta(DE3) <i>E. coli</i>                          | MilliporeSigma                                                                                                                                                                              | Cat# 70954          |
| Rosetta(DE3) pLysS <i>E. coli</i>                    | MilliporeSigma                                                                                                                                                                              | Cat# 70956          |
| <b>Chemicals, Peptides, and Recombinant Proteins</b> |                                                                                                                                                                                             |                     |
| L-methionine (methyl- <sup>13</sup> C, 99%)          | Cambridge Isotope Laboratories, Inc.                                                                                                                                                        | Cat# CLM-206-PK     |
| H3 <sub>1-20</sub> : ARTKQTARKSTGGKAPRKQL            | Genscript                                                                                                                                                                                   |                     |
| H3K4KR: ARTKQTARRSTGGRAPRRQL                         | Genscript                                                                                                                                                                                   |                     |
| <b>Recombinant DNA</b>                               |                                                                                                                                                                                             |                     |
| pET28a-Set7 (109-366)                                | Dr. Cheryl Arrowsmith                                                                                                                                                                       | RRID:Addgene_40746  |
| pET28-PRDM9 (195-415)                                | Dr. Cheryl Arrowsmith                                                                                                                                                                       | RRID:Addgene_162257 |
| pMAL-C2-TEV S219V                                    | (1)                                                                                                                                                                                         | RRID:Addgene_19893  |
| pST44-MWRA                                           | Dr. Song Tan                                                                                                                                                                                | (2)                 |
| pHis-DPY-30 (1-99)                                   | (3)                                                                                                                                                                                         | N/A                 |
| pET19b-SAM Synthetase                                | Dr. Squire J. Booker                                                                                                                                                                        | (4)                 |
| <b>Software and Algorithms</b>                       |                                                                                                                                                                                             |                     |
| ProteinProspector, MS-Product                        | <a href="https://prospector.ucsf.edu/prospector/mshome.htm">https://prospector.ucsf.edu/prospector/mshome.htm</a>                                                                           | RRID:SCR_014558     |
| Spyder (Python)                                      | <a href="https://www.spyder-ide.org">https://www.spyder-ide.org</a>                                                                                                                         | RRID:SCR_017585     |
| TopSpin                                              | <a href="https://www.bruker.com/products/mr/nmr/nmr-software/nmr-software/topspin/overview.html">https://www.bruker.com/products/mr/nmr/nmr-software/nmr-software/topspin/overview.html</a> | RRID:SCR_014227     |
| MATLAB                                               | <a href="https://www.mathworks.com/products/matlab.html">https://www.mathworks.com/products/matlab.html</a>                                                                                 | RRID:SCR_001622     |
| NMRFAM_Sparky                                        | <a href="https://nmrfam.wisc.edu/nmrfam-sparky-distribution/">https://nmrfam.wisc.edu/nmrfam-sparky-distribution/</a>                                                                       | (5)                 |

## Supporting References

1. Kapust, R. B., J. Tozser, J. D. Fox, D. E. Anderson, S. Cherry, T. D. Copeland, and D. S. Waugh. 2001. Tobacco etch virus protease: mechanism of autolysis and rational design of stable mutants with wild-type catalytic proficiency. *Protein Eng* 14(12):993-1000. doi: 10.1093/protein/14.12.993
2. Tan, S., R. C. Kern, and W. Selleck. 2005. The pST44 polycistronic expression system for producing protein complexes in *Escherichia coli*. *Protein Expr Purif* 40(2):385-395. doi: 10.1016/j.pep.2004.12.002
3. Patel, A., V. Dharmarajan, V. E. Vought, and M. S. Cosgrove. 2009. On the mechanism of multiple lysine methylation by the human mixed lineage leukemia protein-1 (MLL1) core complex. *J Biol Chem* 284(36):24242-24256. doi: 10.1074/jbc.M109.014498
4. Iwig, D. F., A. T. Grippe, T. A. McIntyre, and S. J. Booker. 2004. Insight into the polar reactivity of the onium chalcogen analogues of S-adenosyl-L-methionine. *Biochemistry* 43(42):13496-13509. doi: 10.1021/bi048693+
5. Lee, W., M. Tonelli, and J. L. Markley. 2015. NMRFAM-SPARKY: enhanced software for biomolecular NMR spectroscopy. *Bioinformatics* 31(8):1325-1327. doi: 10.1093/bioinformatics/btu830
